# Supplementary material
Source: publisher figshare collection journal article supplement (https://acs.figshare.com/ndownloader/files/4686040)

## Supporting Information

Figure S1. AhR activities of typical ClPAHs and BaP. Each point represents the mean of at least three analyses. Concentrations were plotted on a log scale. EC50 is the concentration producing *lacZ* units equal to 50% of the maximal response.

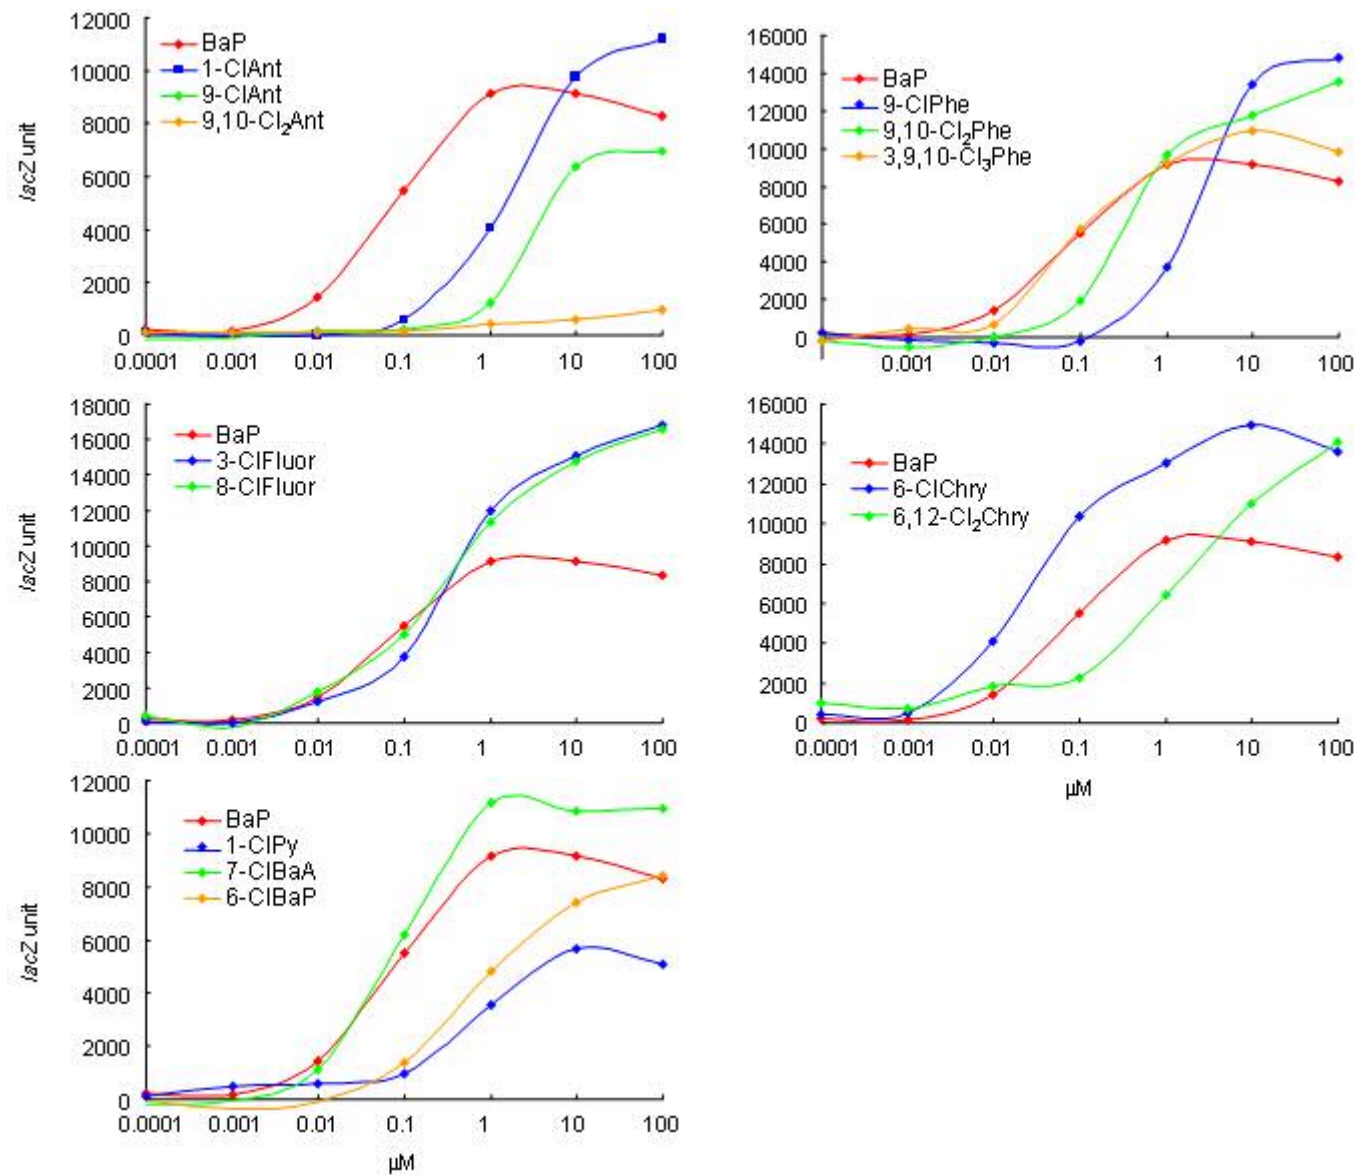

Figure S 2 . Relative intensity of AhR activity of each ClPAH derivative normalized by that of the corresponding parent PAH. Values were calculated from Table 1.

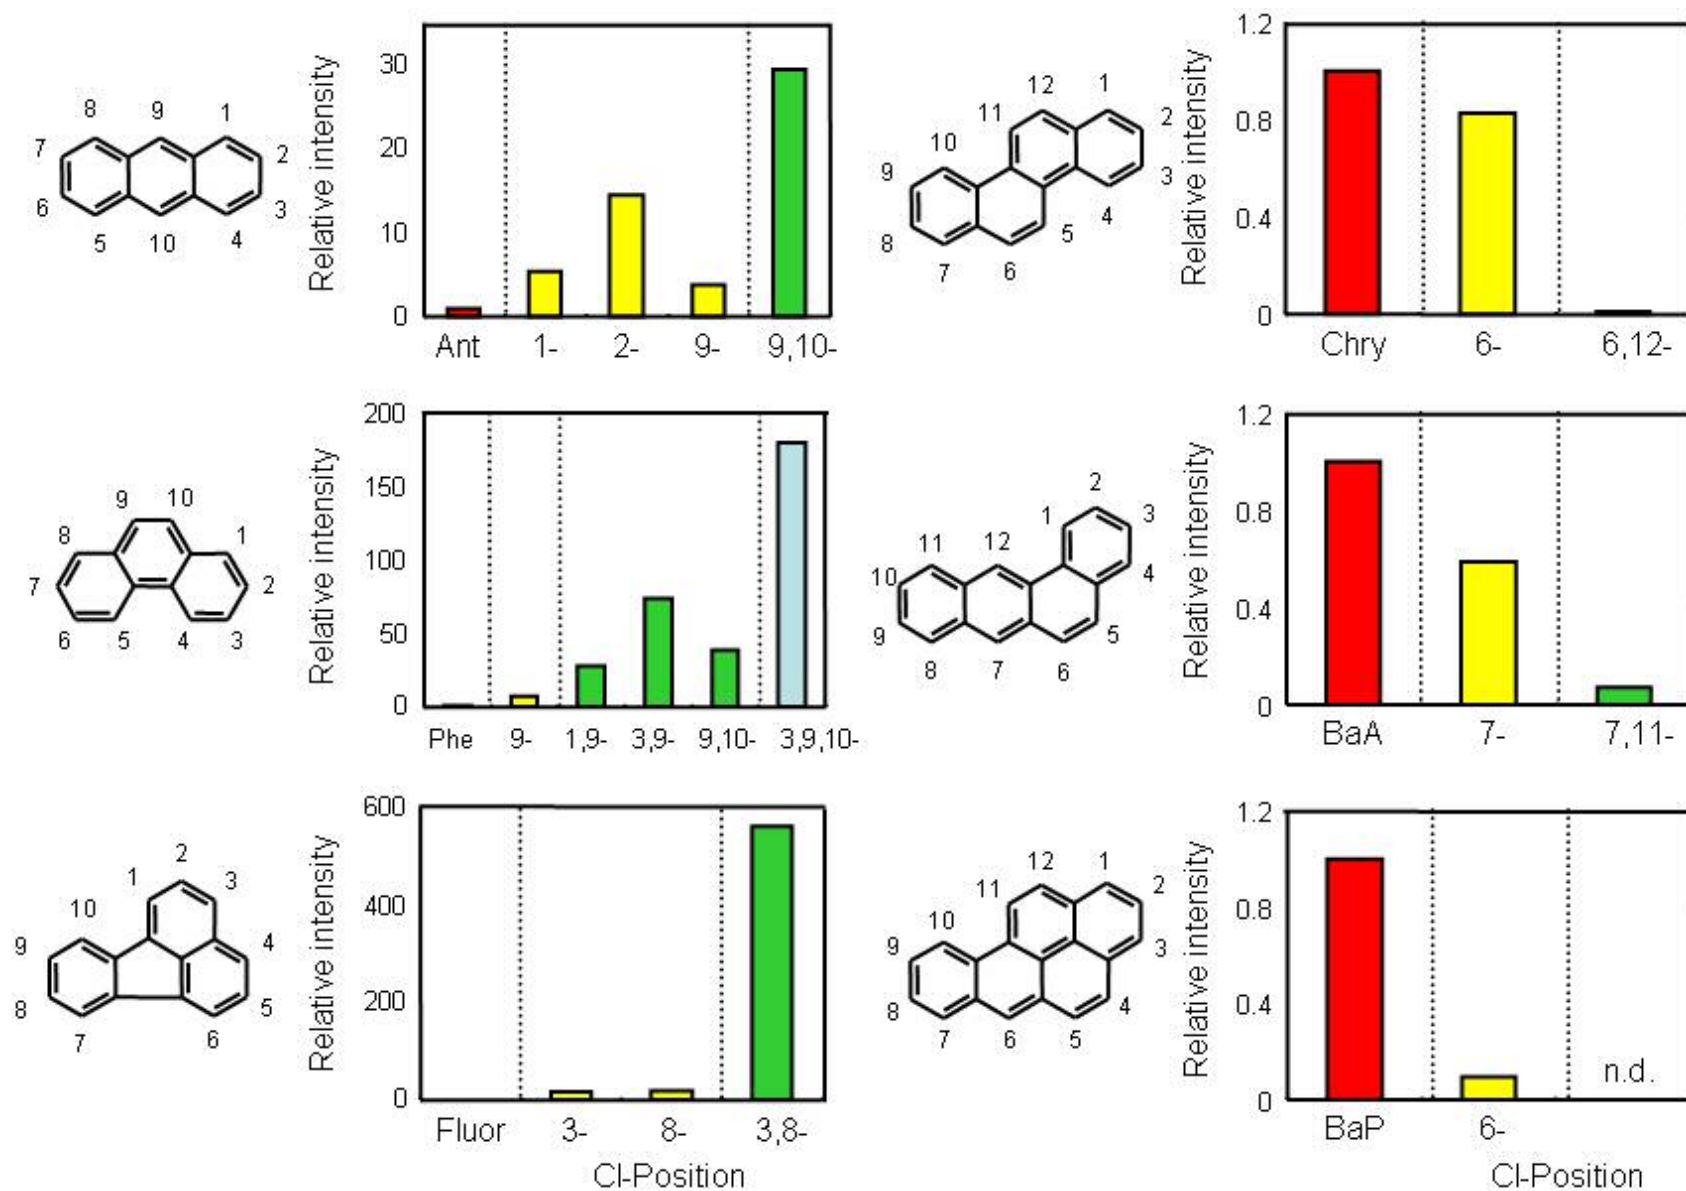

Supplement: Supplementary file 1 [file 4686040]
